# Supplementary material for: HDAC inhibitors cause site-specific chromatin remodeling at PU.1-bound enhancers in K562 cells
Source: PubMed Central journal article supplement (PMC4833939; doi:10.1186/s13072-016-0065-5), 2016-04-16
Supplement: 13072_2016_65_MOESM4_ESM.pdf [file 13072_2016_65_MOESM4_ESM.pdf]

# Supplementary Figure 2

## + NaBut opened DHS

| Motif:                                                                           | E-value:               | Top match:              |
|----------------------------------------------------------------------------------|------------------------|-------------------------|
|  | $2.2 \times 10^{-170}$ | SPI1 ("PU.1", MA0080.3) |
|  | $1.2 \times 10^{-43}$  | GATA2 (MA0036.2)        |
|  | $2.0 \times 10^{-18}$  | RUNX1 (MA0002.2)        |
|  | $1.4 \times 10^{-15}$  | SP2 (MA0516.1)          |

## + SAHA opened DHS

| Motif:                                                                             | E-value:               | Top match:              |
|------------------------------------------------------------------------------------|------------------------|-------------------------|
|   | $1.3 \times 10^{-206}$ | GATA2 (MA0036.2)        |
|   | $4.4 \times 10^{-86}$  | SPI1 ("PU.1", MA0080.3) |
|  | $4.8 \times 10^{-62}$  | ZNF263 (MA0528.1)       |
|   | $8.5 \times 10^{-48}$  | KLF4 (MA0039.2)         |

## + NaBut closed DHS

| Motif:                                                                           | E-value:              | Top match:        |
|----------------------------------------------------------------------------------|-----------------------|-------------------|
|  | $6.1 \times 10^{-74}$ | FOSL1 (MA0477.1)  |
|  | $6.6 \times 10^{-59}$ | ZNF263 (MA0528.1) |
|  | $6.3 \times 10^{-31}$ | GATA3 (MA0037.2)  |
|  | $1.3 \times 10^{-14}$ | MTF1 (UP00097_2)  |

## + SAHA closed DHS

| Motif:                                                                            | E-value:               | Top match:       |
|-----------------------------------------------------------------------------------|------------------------|------------------|
|  | $5.0 \times 10^{-107}$ | NFYB (MA0502.1)  |
|  | $2.0 \times 10^{-100}$ | GATA2 (MA0036.2) |
|  | $2.5 \times 10^{-98}$  | KLF5 (MA0599.1)  |
|  | $2.5 \times 10^{-91}$  | FOS (MA0476.1)   |
