# Supplementary material for: HDAC inhibitors cause site-specific chromatin remodeling at PU.1-bound enhancers in K562 cells
Source: PubMed Central journal article supplement (PMC4833939; doi:10.1186/s13072-016-0065-5), 2016-04-16

# Supplementary Figure 5

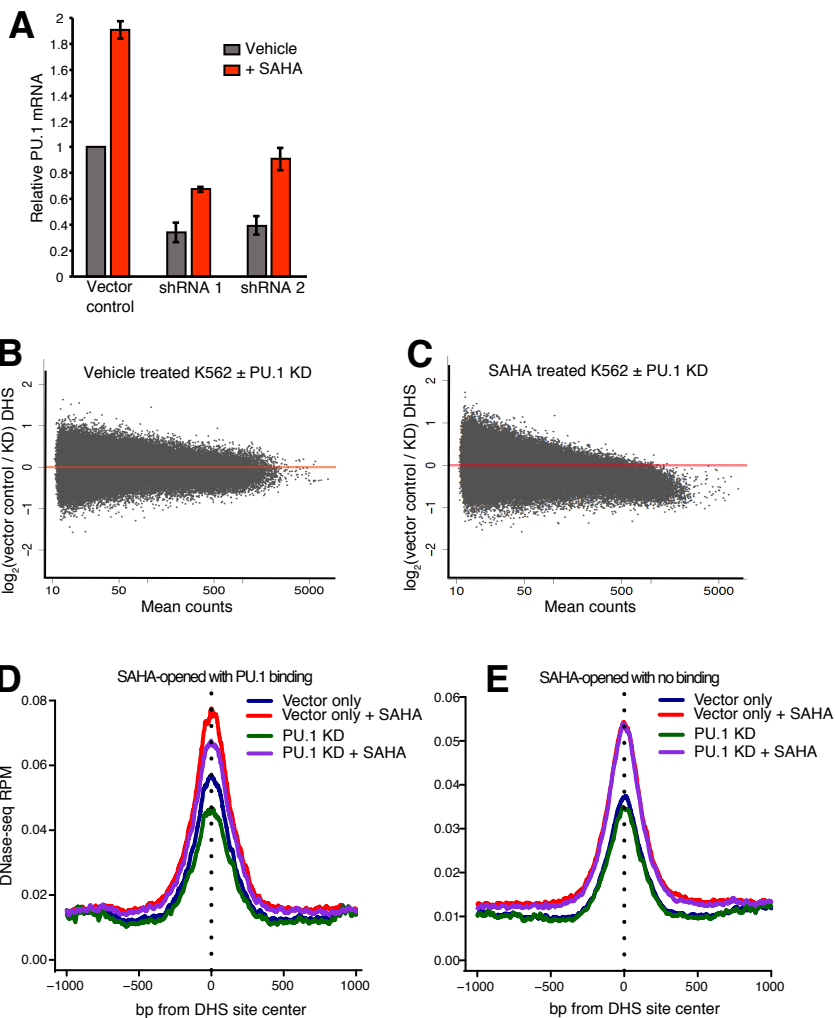

Supplement: 13072_2016_65_MOESM8_ESM.pdf [file 13072_2016_65_MOESM8_ESM.pdf]
